# Supplementary material for: SGLT2 inhibition reprograms systemic metabolism via FGF21-dependent and -independent mechanisms
Source: JCI journal article supplement (doi:10.1172/jci.insight.123130), 2019-03-06
Supplement: sd1 [file 1]

You are being redirected.
